# Supplementary material
Source: Springer Nature journal article supplement (https://www.springermedizin.de/resource/supplementary/13023_2013_628_MOESM2_ESM.pdf/9642548)
Supplement: MOESM2 [file 9642548]

| No. | Biobank Name (Acronym)                                                                                          | Director                       | Host Institution and Location                                               | Establishment Year |
|-----|-----------------------------------------------------------------------------------------------------------------|--------------------------------|-----------------------------------------------------------------------------|--------------------|
| 1   | Cell Line and DNA Biobank from patients affected by Genetic Diseases (IGG-GB)                                   | Mirella Filocamo (Coordinator) | IRCCS G. Gaslini Genova                                                     | 1976               |
| 2   | Galliera Genetic Bank (GGB)                                                                                     | Chiara Baldo (Partner 1)       | E.O. Ospedali Galliera Genova                                               | 1983               |
| 3   | Parkinson Institute Biobank (BPI)                                                                               | Stefano Goldwurm (Partner 2)   | Centro Parkinson Istituti Clinici di Perfezionamento Milano                 | 2002               |
| 4   | Cell lines and DNA bank of Rett syndrome, X-linked mental retardation and other genetic diseases (biobankUNISI) | Alessandra Renieri (Partner 3) | Policlinico Le Scotte Università di Siena Siena                             | 1998               |
| 5   | Neuromuscular Bank of Tissues and DNA samples (NMTB)                                                            | Corrado Angelini (Partner 4)   | Dipartimento Neuroscienze Università di Padova Padova                       | 1982               |
| 6   | Bank of DNA, Cell lines and Nerve-Muscle-Cardiac tissues (biobankNMD-Milan)                                     | Maurizio Moggio (Partner 5)    | Fondazione IRCCS Ca' Granda Ospedale Maggiore Policlinico Milano            | 1986               |
| 7   | Cell, tissues and DNA from patients with Neuromuscular Diseases (NeuMD)                                         | Marina Mora (Partner 6)        | Istituto Neurologico C. Besta Fondazione IRCCS Milano                       | 1986               |
| 8   | Genomic Disorder Biobank (GDB)                                                                                  | Giuseppe Merla (Partner 7)     | IRCCS Casa Sollievo della Sofferenza S. Giovanni Rotondo                    | 2002               |
| 9   | Naples Human Mutation Gene Biobank (NHMGB)                                                                      | Luisa Politano (Partner 8)     | Cardiomiologia e Genetica Medica 2 <sup>a</sup> Università di Napoli Napoli | 1991               |
| 10  | Cell Line and DNA Bank of Paediatric Movement Disorders (PMD)                                                   | Barbara Garavaglia (Partner 9) | Istituto Neurologico C. Besta Fondazione IRCCS Milano                       | 2002               |

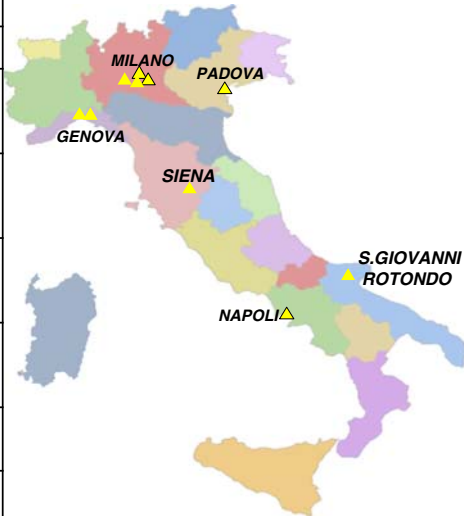

Legend Partners#1-7 are the 7 founding Biobanks #8-10 joined the Network after 1-year pre-admission period
